# Supplementary material for: Emerging Indications for Hyperbaric Oxygen Treatment: Registry Cohort Study
Source: PubMed Central journal article supplement (PMC11372337; doi:10.2196/53821), 2024-08-20
Supplement: ijmr_v13i1e53821_app1.pdf [file ijmr_v13i1e53821_app1.pdf]

**PERIANAL CROHN'S INDEX****1. Do you have an anal fissure or tear in the anal area that won't heal?**

|     |                               |
|-----|-------------------------------|
| Yes | No (if no skip to question 3) |
|-----|-------------------------------|

**2. How much of a problem is this anal fissure or tear**

|      |                                                  |                                                                       |                                                                           |
|------|--------------------------------------------------|-----------------------------------------------------------------------|---------------------------------------------------------------------------|
| None | A little problem, occasional pain and discomfort | A medium problem with pain and discomfort regularly that's manageable | A major problem with significant pain and discomfort that affects my life |
|------|--------------------------------------------------|-----------------------------------------------------------------------|---------------------------------------------------------------------------|

**3. Do you have a fistula or fistulas (pathway from the bowel to the skin or other organ) in/around the anus? If yes, how many?**

|                       |   |   |   |    |
|-----------------------|---|---|---|----|
| No (skip to number 5) | 1 | 2 | 3 | >3 |
|-----------------------|---|---|---|----|

**4. In total, how much discharge do you have from the fistula(s)?**

|      |                        |                                  |                           |                            |
|------|------------------------|----------------------------------|---------------------------|----------------------------|
| None | At little bit of mucus | A medium amount of mucus and pus | A lot of mucus and/or pus | Stool/feces coming through |
|------|------------------------|----------------------------------|---------------------------|----------------------------|

**5. Do you have a rectal discharge?**

|              |                                  |                                            |                    |                           |
|--------------|----------------------------------|--------------------------------------------|--------------------|---------------------------|
| No discharge | A little bit of mucous discharge | A medium amount of mucous or pus discharge | A lot of discharge | Gross fecal/stool soiling |
|--------------|----------------------------------|--------------------------------------------|--------------------|---------------------------|

**6. Are there areas in your anal region that are swollen, firm, or hard to the touch? If yes, how many?**

|    |   |   |   |    |
|----|---|---|---|----|
| No | 1 | 2 | 3 | >3 |
|----|---|---|---|----|

**7. Do you have setons in place? If yes, how many?**

|    |   |   |   |    |
|----|---|---|---|----|
| No | 1 | 2 | 3 | >3 |
|----|---|---|---|----|

**8. Bowel Frequency/Number of Bowel Movements – Daytime**

|       |       |       |    |
|-------|-------|-------|----|
| 1 - 3 | 4 – 6 | 7 – 9 | >9 |
|-------|-------|-------|----|

**9. Bowel Frequency/Number of Bowel Movements – Nighttime**

|   |       |       |    |
|---|-------|-------|----|
| 0 | 1 - 3 | 4 - 6 | >6 |
|---|-------|-------|----|

**10. Urgency of Defecation/Feeling that Need to Move Bowels Right Away**

|      |               |                                 |                                          |
|------|---------------|---------------------------------|------------------------------------------|
| None | Need to Hurry | Need to Move Bowels Immediately | Incontinence/Can't Get to Toilet in Time |
|------|---------------|---------------------------------|------------------------------------------|

**11. Taking Diphenoxylate/atropine (Lomotil), Loperamide (Imodium) or Opiates for Diarrhea?**

No \_\_\_\_\_

Yes \_\_\_\_\_ Frequency of Meds

|             |             |             |       |
|-------------|-------------|-------------|-------|
| 1-2 days/wk | 3-4 days/wk | 5-6 days/wk | daily |
|-------------|-------------|-------------|-------|

**12. Visible Blood in Stool?**

|      |                        |                     |                |
|------|------------------------|---------------------|----------------|
| None | Small streaks of blood | Occasionally bloody | Usually bloody |
|------|------------------------|---------------------|----------------|

**13. Abdominal Pain/Pain in Stomach?**

|      |                              |           |
|------|------------------------------|-----------|
| None | Before/after bowel movements | Prolonged |
|------|------------------------------|-----------|

**14. Taking medications for abdominal pain/pain in stomach?**

No \_\_\_\_\_

Yes \_\_\_\_\_ Frequency of Meds

|             |             |             |       |
|-------------|-------------|-------------|-------|
| 1-2 days/wk | 3-4 days/wk | 5-6 days/wk | daily |
|-------------|-------------|-------------|-------|
