# Supplementary material for: Emerging Indications for Hyperbaric Oxygen Treatment: Registry Cohort Study
Source: PubMed Central journal article supplement (PMC11372337; doi:10.2196/53821), 2024-08-20
Supplement: ijmr_v13i1e53821_app2.pdf [file ijmr_v13i1e53821_app2.pdf]

**Bowel Symptoms Questionnaire**

Before you began experiencing bowel problems, how many  
bowel movements did you typically have in a 24 hour period?

In the last 24 hours how many bowel movements did you have?

|                                                                                                                |       |              |            |          |     |
|----------------------------------------------------------------------------------------------------------------|-------|--------------|------------|----------|-----|
| How many times do you experience bowel movements during the day?                                               | 0 - 6 | 7-10         | 11-14      | 15 - 19  | 20+ |
| How many times do you experience bowel movements at night?                                                     | 0     | 1            | 2          | 3        | 4+  |
| If you get up to go to the bathroom at night, does it bother you?                                              | Never | Mildly       | Moderately | Severely |     |
| Do you have blood in your stool?                                                                               | Never | Occasionally | Usually    | Always   |     |
| Do you have pain associated with your bowel or in your pelvis (rectum, GI tract, etc.)?                        | Never | Occasionally | Usually    | Always   |     |
| If you have pain with bowel movements, is it usually...                                                        |       | Mild         | Moderate   | Severe   |     |
| Does your pain bother you?                                                                                     | Never | Occasionally | Usually    | Always   |     |
| Do you have urgency associated with the need to move your bowels (feeling the need to move bowels right away)? | Never | Occasionally | Usually    | Always   |     |
| If you have urgency to move your bowels, is it usually...                                                      |       | Mild         | Moderate   | Severe   |     |
| Does your urgency bother you?                                                                                  | Never | Occasionally | Usually    | Always   |     |
